# Supplementary material for: Facile synthesis of silver nanoparticle-decorated graphene oxide nanocomposites and their application for electrochemical sensing
Source: Royal Society of Chemistry journal article supplement (doi:10.1039/c5nj01621e), 2015-01-01
Supplement: c5nj01621e1.pdf [file c5nj01621e1.pdf]

New Journal of Chemistry

Electronic Supplementary Information

**Facile synthesis of silver nanoparticles-decorated graphene oxide  
nanocomposites and their application for electrochemical sensing**

Ziyin Yang, Chengcheng Qi, Xiaohui Zheng and Jianbin Zheng \*

Institute of Analytical Science, Shaanxi Provincial Key Laboratory of Electroanalytical Chemistry,

Northwest University, Xi'an, Shaanxi 710069, China.

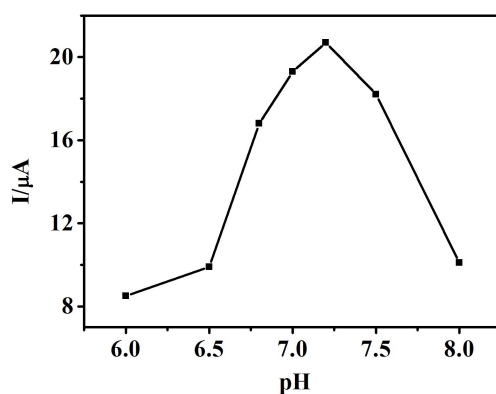

Figure S1. The current response values of AgNPs-TWEEN-GO/GCE with different pH in the presence of 0.5 mM H<sub>2</sub>O<sub>2</sub>.

Figure S1 shows the current response with various pH values. It can be seen obviously that the current increase with the increase of pH and reaches a maximum at the pH value of 7.2. Therefore, the PBS at pH value of 7.2 was selected as the electrolyte in this work.

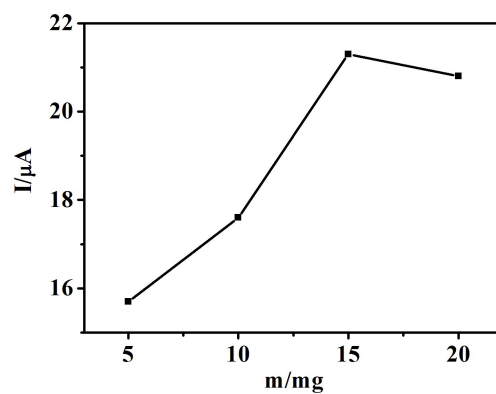

Figure S2. The current response values of AgNPs-TWEEN-GO/GCE with different amounts of AgNPs

Figure S2 shows the current response with different amounts of AgNPs. It can be seen obviously that the current increase with the increase of AgNPs. However, when more than 15 mg of AgNPs was added in the synthetic process, the current did not increase obviously, which may be too many AgNPs have been aggregated. Therefore, 15 mg of AgNPs was selected to add in the synthetic process.
